# Supplementary material
Source: PubMed Central journal article supplement (PMC3312018)
Supplement: NIHMS356907-supplement-supplementary_data.pdf [file NIHMS356907-supplement-supplementary_data.pdf]

Supplemental Table: Model Fit Parameters. Parameter averages were used to generate EUD and E (3 patient response categories from Table 3), and E (patient averages not split into categories).

| Subject | Tumor          | Average Dose (Gy) | $\alpha$ (Gy <sup>-1</sup> ) | $\lambda_p$ (gr/mg <sub>p</sub> /hr) | 3 Response Categories |      | Patient Specific | Notes |
|---------|----------------|-------------------|------------------------------|--------------------------------------|-----------------------|------|------------------|-------|
|         |                |                   |                              |                                      | EUD (Gy)              | E    | E                |       |
| 1       | Pelvis         | 1.57              | 0.2                          | 0.0                                  | 1.13                  | 0.25 | 0.22             |       |
| 2       | Paraaortic     | 2.73              | 0.19                         | 0.0                                  | 2.28                  | 0.51 | 0.42             |       |
| 3       | Inguinal       | 2.48              | 0.8                          | 0.139                                | 3.61                  | 1.17 | 1.93             |       |
|         | Iliac          | 2.30              | 0.1                          | 0.198                                | 3.28                  | 1.07 | 1.77             |       |
| 4       | Pelvis big     | 4.34              | .23                          | 0.0                                  | 3.79                  | 0.84 | 0.87             |       |
|         | Pelvis small   | 4.30              | .23                          | 0.0                                  | 3.73                  | 0.83 | 0.86             |       |
| 5       | Renal          | 3.54              | 0.52                         | 0.028                                | 4.16                  | 1.35 | 1.47             |       |
|         | L ParaAortic   | 3.14              | 0.4                          | 0.099                                | 3.78                  | 1.23 | 1.33             |       |
|         | Central        | 3.44              | 0.25                         | 0.023                                | 4.55                  | 1.48 | 1.56             |       |
|         | Hepatic        | 3.66              | 0.4                          | 0.058                                | 4.47                  | 1.45 | 1.57             |       |
|         | Crux           | 3.17              | 0.35                         | 0.087                                | 3.89                  | 1.26 | 1.36             |       |
| 6       | L iliac        | 3.87              | 0.53                         | 0.107                                | 6.50                  | 2.11 | 3.17             |       |
|         | Paraaortic     | 3.85              | 0.05                         | 0.099                                | 6.16                  | 2.00 | 3.00             | \$    |
| 7       | R inguinal up  | 2.21              | 0.43                         | 0.050                                | 3.23                  | 1.05 | 1.04             | #     |
|         | R inguinal big | 2.61              | 0.28                         | 0.017                                | 4.01                  | 1.30 | 1.30             | #, \$ |

|    |                     |      |      |       |      |      |      |       |
|----|---------------------|------|------|-------|------|------|------|-------|
|    | R inguinal small    | 1.09 | 0.8  | 0.069 | 1.41 | 0.46 | 0.47 | #     |
|    | L inguinal up       | 2.07 | 0.12 | 0.087 | 3.50 | 1.14 | 1.10 | #     |
|    | L inguinal big      | 2.60 | 0.34 | 0.058 | 3.90 | 1.27 | 1.26 | #, \$ |
|    | L inguinal small    | 1.91 | 0.45 | 0.050 | 3.02 | 0.98 | 0.95 | #, \$ |
| 8  | R inguinal lateral  | 1.71 | 2.2  | 0.014 | 1.62 | 2.13 | 2.13 | #     |
|    | R inguinal medial   | 3.62 | 0.45 | 0.046 | 3.65 | 4.82 | 4.82 | #     |
|    | R iliac             | 3.41 | 0.96 | 0.023 | 3.17 | 4.19 | 4.19 | #     |
|    | R aortic            | 3.64 | 0.35 | 0.050 | 3.08 | 4.06 | 4.06 | #     |
|    | R anterior acetab.  | 3.71 | 2.2  | 0.005 | 2.97 | 3.92 | 3.92 | #     |
|    | R posterior acetab. | 3.80 | 1.9  | 0.005 | 3.70 | 4.89 | 4.89 | #     |
|    | L acetabulum        | 4.20 | 1.2  | 0.035 | 4.21 | 5.57 | 5.57 | #     |
| 9  | R inguinal          | 1.13 | 0.6  | 0.173 | 1.74 | 0.56 | 0.84 |       |
|    | L inguinal          | 1.02 | 0.42 | 0.116 | 1.47 | 0.48 | 0.71 |       |
|    | L iliac             | 1.24 | 0.06 | 0.154 | 1.92 | 0.63 | 0.93 |       |
| 10 | R anterior iliac    | 4.13 | 0.2  | 0.058 | 4.95 | 1.61 | 1.15 |       |
|    | R posterior iliac   | 4.03 | 0.2  | 0.099 | 4.97 | 1.62 | 1.14 |       |
|    | R inguinal          | 3.58 | 0.25 | 0.046 | 4.00 | 1.30 | 0.95 |       |
| 11 | L kidney up         | 5.75 | 0.2  | 0.0   | 5.37 | 1.19 | 0.70 | \$    |
|    | L kidney down       | 5.65 | 0.15 | 0.0   | 5.11 | 1.14 | 0.67 |       |

|    |                     |      |      |       |      |      |      |       |
|----|---------------------|------|------|-------|------|------|------|-------|
|    | R psoas             | 5.66 | 0.06 | 0.0   | 5.43 | 1.21 | 0.72 |       |
| 12 | Para vertebral      | 2.45 | 0.3  | 0.035 | 3.23 | 1.05 | 0.78 | #     |
| 13 | Hilar spleen        | 3.91 | 0.4  | 0.069 | 5.47 | 1.77 | 1.43 |       |
|    | L dph               | 3.00 | 0.3  | 0.099 | 3.75 | 1.22 | 0.97 |       |
|    | L paraaortic        | 3.06 | 0.28 | 0.046 | 3.95 | 1.28 | 1.03 |       |
|    | L psoas             | 2.49 | 0.28 | 0.050 | 3.16 | 1.03 | 0.82 |       |
|    | R dph down          | 3.03 | 0.1  | 0.099 | 3.87 | 1.26 | 1.01 |       |
|    | R dph up            | 2.96 | 0.35 | 0.046 | 3.72 | 1.21 | 0.97 |       |
|    | R paraaortic        | 3.26 | 0.15 | 0.046 | 4.05 | 1.32 | 1.06 |       |
| 14 | L neck up           | 2.15 | 0.27 | 0.0   | 1.73 | 0.38 | 0.57 |       |
|    | L neck mid          | 2.94 | 0.11 | 0.0   | 2.50 | 0.56 | 0.81 |       |
|    | L neck down         | 3.52 | 0.55 | 0.0   | 3.09 | 0.69 | 0.99 |       |
| 15 | Central             | 4.55 | 0.2  | 0.0   | 4.13 | 0.92 | 0.82 | #, \$ |
| 16 | Abdominal           | 1.96 | 0.29 | 0.0   | 1.51 | 0.34 | 0.47 |       |
| 18 | Lung                | 2.39 | 0.4  | 0.347 | 3.48 | 1.13 | 2.38 | #, *  |
| 19 | L neck              | 4.08 | 0.16 | 0.028 | 7.14 | 2.32 | 0.90 |       |
| 20 | L iliac             | 3.41 | 0.15 | 0.063 | 5.64 | 1.83 | 0.72 |       |
|    | L inguinal inferior | 3.77 | 0.15 | 0.055 | 5.81 | 1.89 | 0.79 |       |
|    | R iliac             | 7.11 | 0.1  | 0.012 | 8.91 | 2.90 | 1.38 |       |

|                     |      |      |       |      |      |      |
|---------------------|------|------|-------|------|------|------|
| R inguinal inferior | 5.53 | 0.1  | 0.023 | 8.11 | 2.64 | 1.21 |
| R inguinal lateral  | 3.64 | 0.05 | 0.058 | 5.00 | 1.63 | 0.70 |
| R inguinal medial   | 5.31 | 0.15 | 0.063 | 9.15 | 2.98 | 1.35 |
| R inguinal superior | 2.95 | 0.05 | 0.126 | 4.48 | 1.46 | 0.63 |

# Radiation inactivated tumor cell clearance delay not used ( $t_d = 0$ ) § First tumor volume ignored for tumor size normalization

\* Cell clearance parameter decreased ( $T_c = 1.5$  d)
